# Supplementary material for: Parenthood and the risk of diabetes in men and women: a 7 year prospective study of 0.5 million individuals
Source: PubMed Central journal article supplement (PMC4930461; doi:10.1007/s00125-016-3980-x), 2016-05-18
Supplement: 125_2016_3980_MOESM1_ESM.pdf [file 125_2016_3980_MOESM1_ESM.pdf]

## Members of the CKB Collaborative Group

**International Steering Committee:** Junshi Chen, Zhengming Chen (PI), Rory Collins, Liming Li (PI), Richard Peto.

**International Co-ordinating Centre, Oxford:** Daniel Avery, Derrick Bennett, Yumei Chang, Yiping Chen, Zhengming Chen, Robert Clarke, Huaidong Du, Xuejuan Fan, Simon Gilbert, Alex Hacker, Michael Holmes, Andri Iona, Christiana Kartsonaki, Rene Kerosi, Ling Kong, Om Kurmi, Garry Lancaster, Sarah Lewington, John McDonnell, Winnie Mei, Iona Millwood, Qunhua Nie, Jayakrishnan Radhakrishnan, Sajjad Rafiq, Paul Ryder, Sam Sansome, Dan Schmidt, Paul Sherliker, Rajani Sohoni, Iain Turnbull, Robin Walters, Jenny Wang, Lin Wang, Ling Yang, Xiaoming Yang.

**National Co-ordinating Centre, Beijing:** Zheng Bian, Ge Chen, Yu Guo, Bingyang Han, Can Hou, Jun Lv, Pei Pei, Shuzhen Qu, Yunlong Tan, Canqing Yu, Huiyan Zhou.

**Ten Regional Co-ordinating Centres:** **Qingdao** Qingdao CDC: Zengchang Pang, Ruqin Gao, Shaojie Wang, Yongmei Liu, Ranran Du, Yajing Zang, Liang Cheng, Xiaocao Tian, Hua Zhang. **Licang** CDC: Silu Lv, Junzheng Wang, Wei Hou. **Heilongjiang** Provincial CDC: Jiyuan Yin, Ge Jiang, Shumei Liu, Zhigang Pang, Xue Zhou. **Nangang** CDC: Liqiu Yang, Hui He, Bo Yu, Yanjie Li, Huaiyi Mu, Qinai Xu, Meiling Dou, Jiaojiao Ren. **Hainan** Provincial CDC: Jianwei Du, Shanqing Wang, Ximin Hu, Hongmei Wang, Jinyan Chen, Yan Fu, Zhenwang Fu, Xiaohuan Wang, Hua Dong. **Meilan** CDC: Min Weng, Xiangyang Zheng, Yijun Li, Huimei Li, Chenglong Li. **Jiangsu** Provincial CDC: Ming Wu, Jinyi Zhou, Ran Tao, Jie Yang. **Suzhou** CDC: Jie Shen, Yihe Hu, Yan Lu, Yan Gao, Liangcai Ma, Renxian Zhou, Aiyu Tang, Shuo Zhang, Jianrong Jin. **Guangxi** Provincial CDC: Zhenzhu Tang, Naying Chen, Ying Huang. **Liuzhou** CDC: Mingqiang Li, Jinhuai Meng, Rong Pan, Qilian Jiang, Jingxin Qing, Weiyuan Zhang, Yun Liu, Liuping Wei, Liyuan Zhou, Ningyu Chen, Jun Yang, Hairong Guan. **Sichuan** Provincial CDC: Xianping Wu, Ningmei Zhang, Xiaofang Chen, Xuefeng Tang. **Pengzhou** CDC: Guojin Luo, Jianguo Li, Xiaofang Chen, Jian Wang, Jiaqiu Liu, Qiang Sun. **Gansu** Provincial CDC: Pengfei Ge, Xiaolan Ren, Caixia Dong. **Maiji** CDC: Hui Zhang, Enke Mao, Xiaoping Wang, Tao Wang. **Henan** Provincial CDC: Guohua Liu, Baoyu Zhu, Gang Zhou, Shixian Feng, Liang Chang, Lei Fan. **Huixian** CDC: Yulian Gao, Tianyou He, Li Jiang, Huarong Sun, Pan He, Chen Hu, Qiannan Lv, Xukui Zhang. **Zhejiang** Provincial CDC: Min Yu, Ruying Hu, Le Fang, Hao Wang. **Tongxiang** CDC: Yijian Qian, Chunmei Wang, Kaixue Xie, Lingli Chen, Yaxing Pan, Dongxia Pan. **Hunan** Provincial CDC: Yuelong Huang, Biyun Chen, Donghui Jin, Huilin Liu, Zhongxi Fu, Qiaohua Xu. **Liuyang** CDC: Xin Xu, Youping Xiong, Weifang Jia, Xianzhi Li, Libo Zhang, Zhe Qiu.

**ESM Table 1: Hazard ratios (95% confidence intervals) for incident diabetes associated with number of children in sensitivity analyses**

|                                      | Number of children |                   |                   |                   |                   | Per additional child* |
|--------------------------------------|--------------------|-------------------|-------------------|-------------------|-------------------|-----------------------|
|                                      | 0 children         | 1 child           | 2 children        | 3 children        | ≥4 children       |                       |
| <b>Women</b>                         |                    |                   |                   |                   |                   |                       |
| Model III                            | 1.39 (1.11, 1.73)  | 1.00 (0.92, 1.08) | 1.12 (1.07, 1.18) | 1.23 (1.16, 1.31) | 1.32 (1.21, 1.44) | 1.04 (1.02, 1.06)     |
| Model III, excluding couples†        | 1.26 (0.98, 1.61)  | 1.00 (0.92, 1.09) | 1.10 (1.05, 1.16) | 1.15 (1.07, 1.24) | 1.27 (1.16, 1.40) | 1.03 (1.01, 1.05)     |
| Model III, excluding large families± | 1.38 (1.10, 1.72)  | 1.00 (0.92, 1.08) | 1.12 (1.07, 1.17) | 1.22 (1.14, 1.30) | 1.30 (1.19, 1.42) | 1.06 (1.03, 1.09)     |
| <b>Men</b>                           |                    |                   |                   |                   |                   |                       |
| Model III                            | 1.28 (1.02, 1.60)  | 1.00 (0.91, 1.10) | 1.19 (1.12, 1.26) | 1.32 (1.21, 1.44) | 1.41 (1.24, 1.60) | 1.03 (1.01, 1.05)     |
| Model III, excluding couples†        | 1.27 (1.00, 1.61)  | 1.00 (0.90, 1.11) | 1.27 (1.19, 1.36) | 1.41 (1.27, 1.56) | 1.50 (1.30, 1.73) | 1.03 (1.01, 1.05)     |
| Model III, excluding large families± | 1.27 (1.02, 1.59)  | 1.00 (0.91, 1.10) | 1.18 (1.12, 1.25) | 1.31 (1.20, 1.43) | 1.40 (1.24, 1.58) | 1.09 (1.05, 1.14)     |

Analyses are stratified by age at risk and region, and adjusted for level of attained education, household income, smoking status, alcohol use, SBP, history of hypertension, physical activity, and BMI. \*Analyses restricted to individuals with children. † Individuals were considered a couple if a person called 'A' had listed their partner's name as 'B', AND a person called 'B' had listed their partner's name as 'A', AND they both live at the same address, AND had the same home telephone number. ± A large family was defined as having more than 10 children.

**ESM Table 2: Percentage of participants with screen-detected diabetes at study baseline without a history of cardiovascular disease and self-reported diabetes, overall and by number of children**

|              | <b>Overall</b> | <b>0 children</b> | <b>1 child</b> | <b>2 children</b> | <b>3 children</b> | <b>≥4 children</b> |
|--------------|----------------|-------------------|----------------|-------------------|-------------------|--------------------|
| <b>Women</b> | 2.8%           | 2.9%              | 2.1%           | 2.7%              | 3.5%              | 4.5%               |
| <b>Men</b>   | 2.7%           | 2.5%              | 2.8%           | 2.4%              | 2.8%              | 2.9%               |
